# Supplementary material for: Predicting the potential habitats of two Lycium species and the quality suitability of Lycium Chinese Mill. Cortex under climate change
Source: Research Square preprint supplement (doi:10.21203/rs.3.rs-5490896/v1), 2025-04-29
Supplement: Supplementary file 1 [file 392687405ff00e3bb4ae52f7.docx]

**Table S1** The 30 environmental variables in the Maxent model.

| No. | | Description | Abbreviation |
| --- | --- | --- | --- |
| 1 | Mean Annual Temperature | | Bio1 |
| 2 | Monthly Mean Diurnal Temperature Range | | Bio2 |
| 3 | Isotherm | | Bio3 |
| 4 | Standard Deviation of Temperature Seasonality | | Bio4 |
| 5 | Maximum Temperature of the Warmest Month | | Bio5 |
| 6 | Minimum Temperature of the Coldest Month | | Bio6 |
| 7 | Temperature Annual Range | | Bio7 |
| 8 | Mean Temperature of the Wettest Quarter | | Bio8 |
| 9 | Mean Temperature of the Driest Quarter | | Bio9 |
| 10 | Mean Temperature of the Warmest Quarter | | Bio10 |
| 11 | Mean Temperature of the Coldest Quarter | | Bio11 |
| 12 | Annual Precipitation | | Bio12 |
| 13 | Precipitation of the Wettest Month | | Bio13 |
| 14 | Precipitation of the Driest Month | | Bio14 |
| 15 | Coefficient of Variation of Seasonal Precipitation | | Bio15 |
| 16 | Precipitation of the Wettest Quarter | | Bio16 |
| 17 | Precipitation of the Driest Quarter | | Bio17 |
| 18 | Precipitation of the Warmest Quarter | | Bio18 |
| 19 | Precipitation of the Coldest Quarter | | Bio19 |


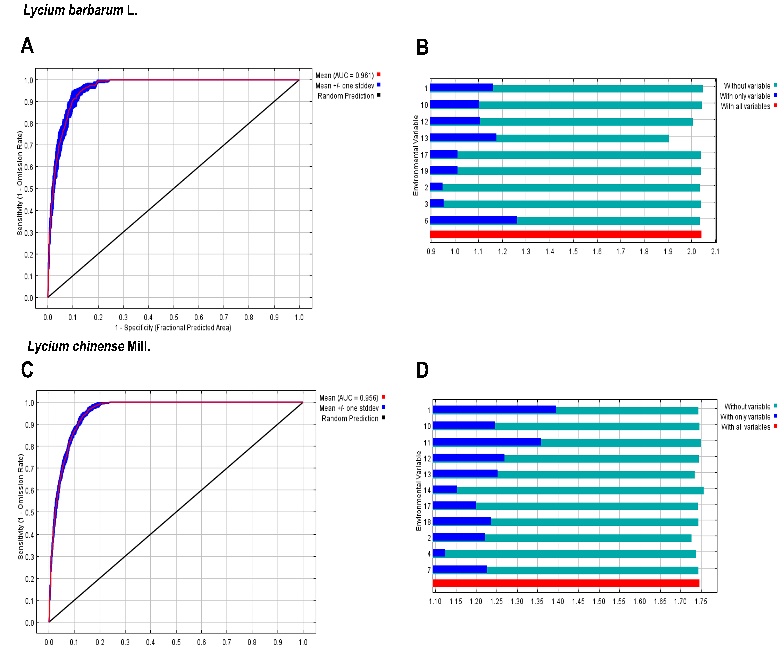


**Figure S1** The AUC value (**A**) and jackknife test (**B**) of L. *barbarum*; The AUC value (**C**) and jackknife test (**D**) of L. *Chinese*.

**Table S2** The different suitable quality areas of kukoamine B in different conditions.

| Conditions | Highly suitable area/×106 km2 | Moderately suitable area/×106 km2 | Poorly suitable area/×106 km2 | The total suitable area/×106 km2 |
| --- | --- | --- | --- | --- |
| Current | 0.2640 | 1.7840 | 1.2942 | 3.3422 |
| RCP2.6-2050s | 0.2360 | 1.5904 | 1.3825 | 3.2089 |
| RCP2.6-2070s | 0.1911 | 1.6891 | 1.3148 | 3.1950 |
| RCP4.5-2050s | 0.2053 | 1.6708 | 1.3817 | 3.2579 |
| RCP4.5-2070s | 0.2049 | 1.6738 | 1.3848 | 3.2635 |
| RCP8.5-2050s | 0.2364 | 1.4895 | 1.4807 | 3.2066 |
| RCP8.5-2070s | 0.2124 | 1.7440 | 1.2788 | 3.2352 |

**Table S3** The different suitable quality areas of kukoamine A in different conditions.

| Conditions | Highly suitable area/×106 km2 | Moderately suitable area/×106 km2 | Poorly suitable area/×106 km2 | The total suitable area/×106 km2 |
| --- | --- | --- | --- | --- |
| Current | 0.1754 | 1.3532 | 1.1567 | 2.6853 |
| RCP2.6-2050s | 0.1713 | 1.2461 | 1.1478 | 2.5652 |
| RCP2.6-2070s | 0.1530 | 1.3277 | 1.0964 | 2.5772 |
| RCP4.5-2050s | 0.1562 | 1.2802 | 1.1681 | 2.6045 |
| RCP4.5-2070s | 0.1668 | 1.2802 | 1.1926 | 2.6396 |
| RCP8.5-2050s | 0.1774 | 1.1677 | 1.2186 | 2.5637 |
| RCP8.5-2070s | 0.1696 | 1.3682 | 1.0641 | 2.6018 |
